# Supplementary material for: Genus-wide sequencing supports a two-locus model for sex-determination in Phoenix
Source: PubMed Central journal article supplement (PMC6162277; doi:10.1038/s41467-018-06375-y), 2018-09-28
Supplement: 41467_2018_6375_MOESM1_ESM.pdf [file 41467_2018_6375_MOESM1_ESM.pdf]

**Genus-wide sequencing supports a two-locus model for sex-determination in *Phoenix***

Torres *et al.*

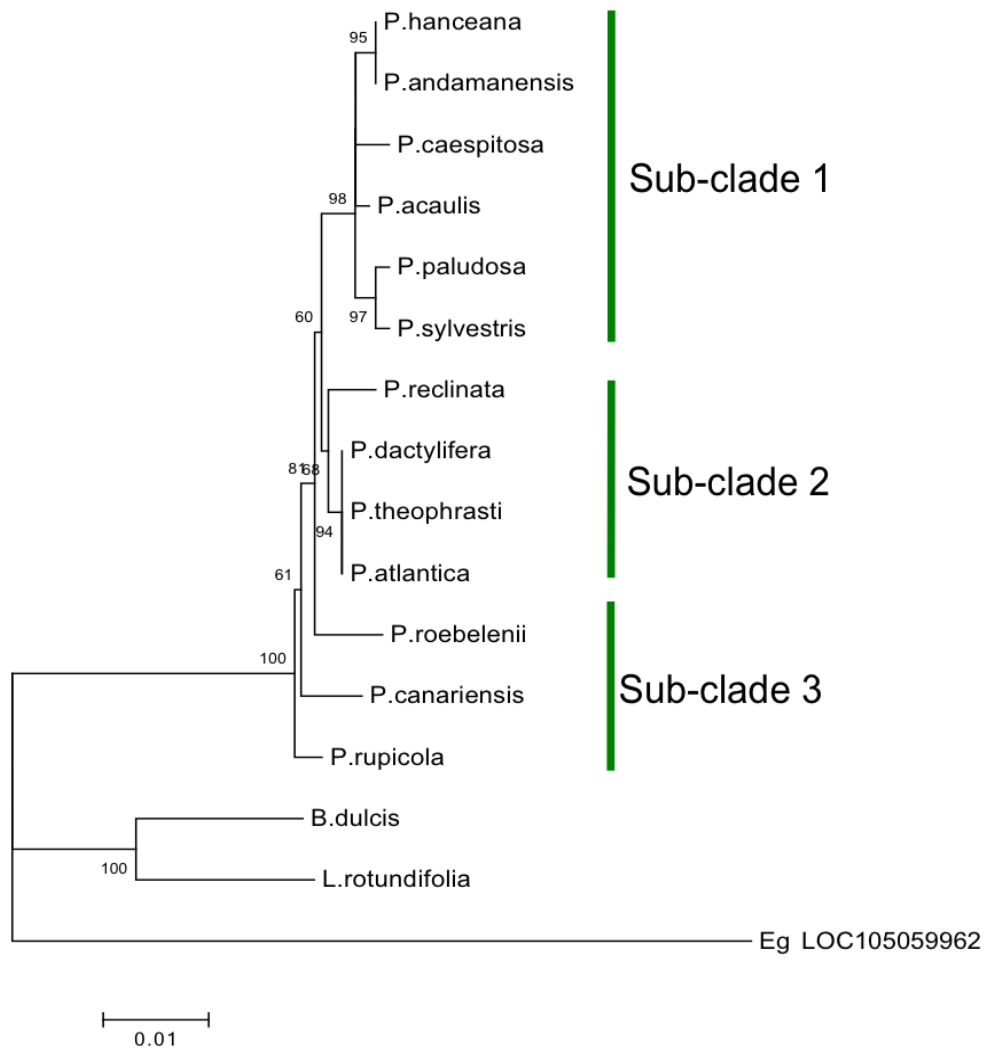

**Supplementary Figure 1. Cyp703 phylogeny.** Maximum likelihood phylogenetic tree based on alignment of k-mer derived *CYP703* cDNA sequences from *Phoenix* and the hermaphrodites *Brahea* and *Livistona*. Branch support values at the nodes (if >50%) were obtained by 1000 bootstrap replications. Branch lengths represent number of substitutions per site. The oil palm *CYP703A* sequence (Eg\_LOC105059962) was utilized to infer *de novo* sequences from other palm species. Eg= *Elaeis guineensis*. *B. dulcis*= *Brahea dulcis*. *L. rotundifolia* = *Livistona rotundifolia*

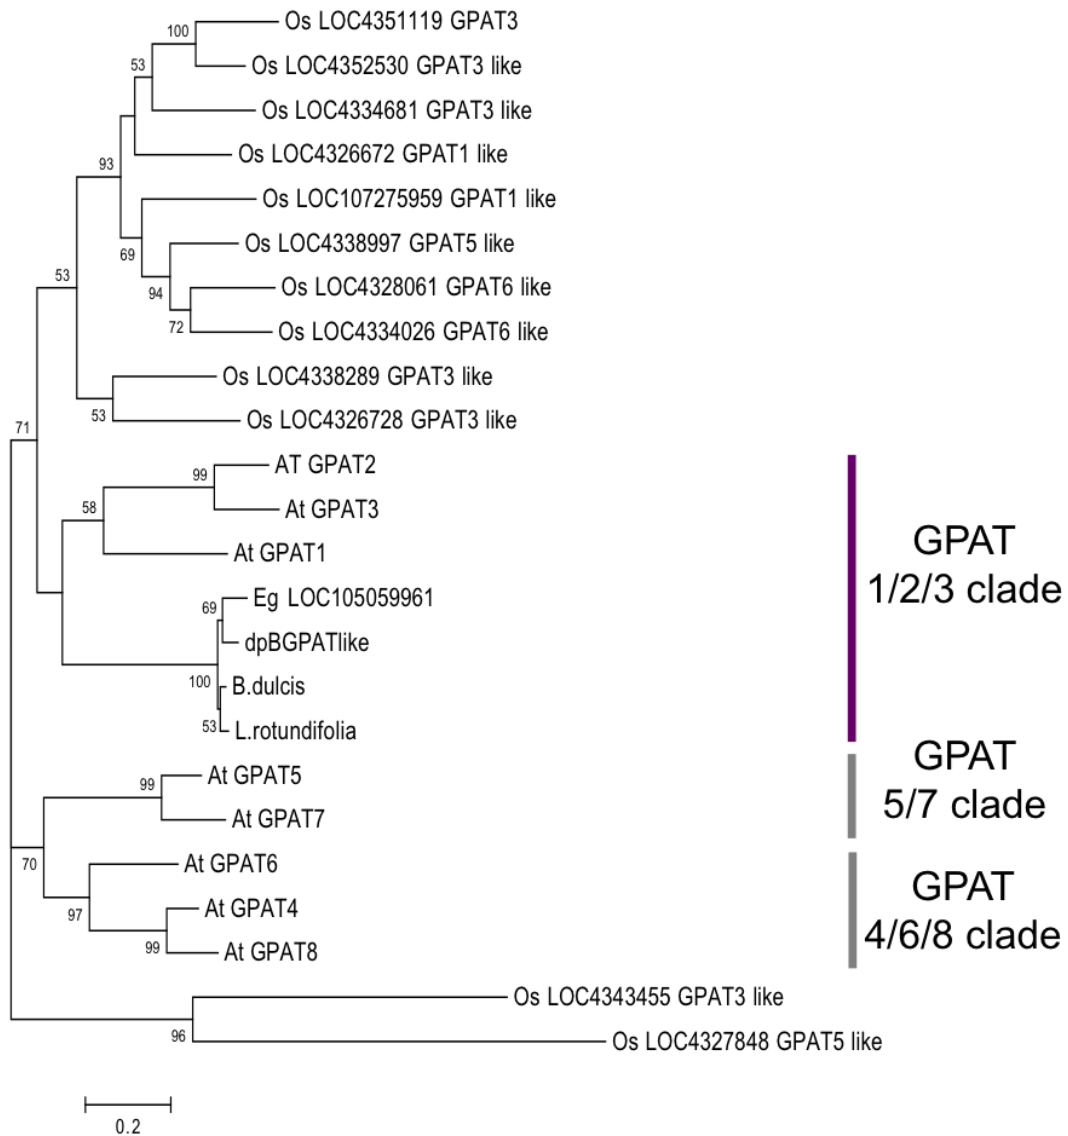

**Supplementary Figure 2. GPAT phylogeny.** Maximum likelihood phylogenetic tree based on alignment of GPAT sequences from Arabidopsis, rice and k-mer inferred sequences from *P. dactylifera*, *Brahea* and *Livistona*.

Branch support values indicated at the nodes (if >50%) were obtained by 1000 bootstrap replications. Branch lengths represent number of substitutions per site. The oil palm GPAT sequence (Eg\_LOC105059961) was utilized to infer *de novo* GPAT sequences from other palm species. Arabidopsis and rice sequences were described by Beisson *et al.*<sup>1</sup> and Men *et al.*<sup>2</sup>. Os= *Oryza sativa*. At= *Arabidopsis thaliana*.. Eg= *Elaeis guineensis*. B. dulcis= *Brahea dulcis*. L. rotundifolia = *Livistona rotundifolia*. dpBGPATlike= date palm kmer GPAT gene

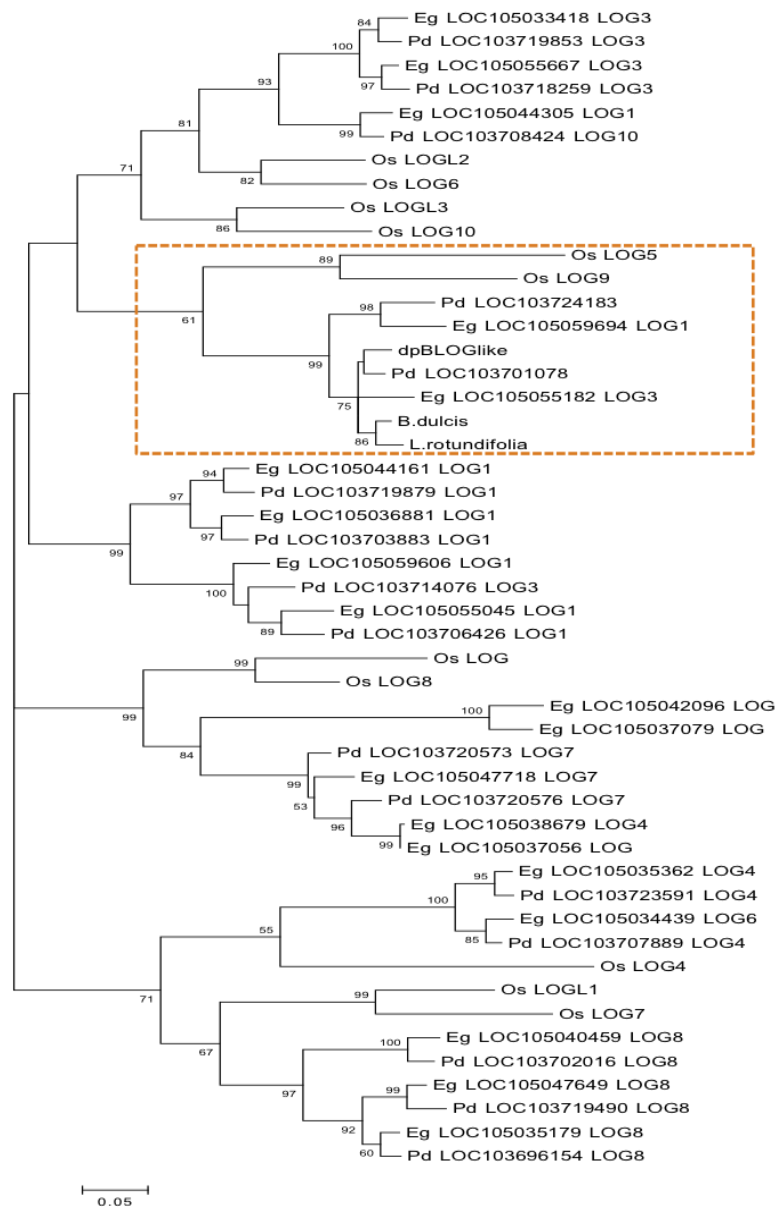

**Supplementary Figure 3. LOG phylogeny.** Maximum likelihood phylogenetic tree based on alignment of all LOG sequences from oil palm, date palm, rice and k-mer inferred sequences from *P. dactylifera*, *Brahea* and *Livistona*. Branch support values indicated at the nodes (if >50%) were obtained by 1000 bootstrap replications. Branch lengths represent number of substitutions per site. The oil palm LOG sequence (Eg\_LOC105055182) was utilized to search the NCBI database for similarities in the entire date palm and oil palm genomes. Os= *Oryza sativa*. Pd= *Phoenix dactylifera*. Eg= *Elaeis guineensis*. B. dulcis= *Brahea dulcis*. L. rotundifolia = *Livistona rotundifolia*. dpBLOGlike= date palm male-specific kmer LOG gene.

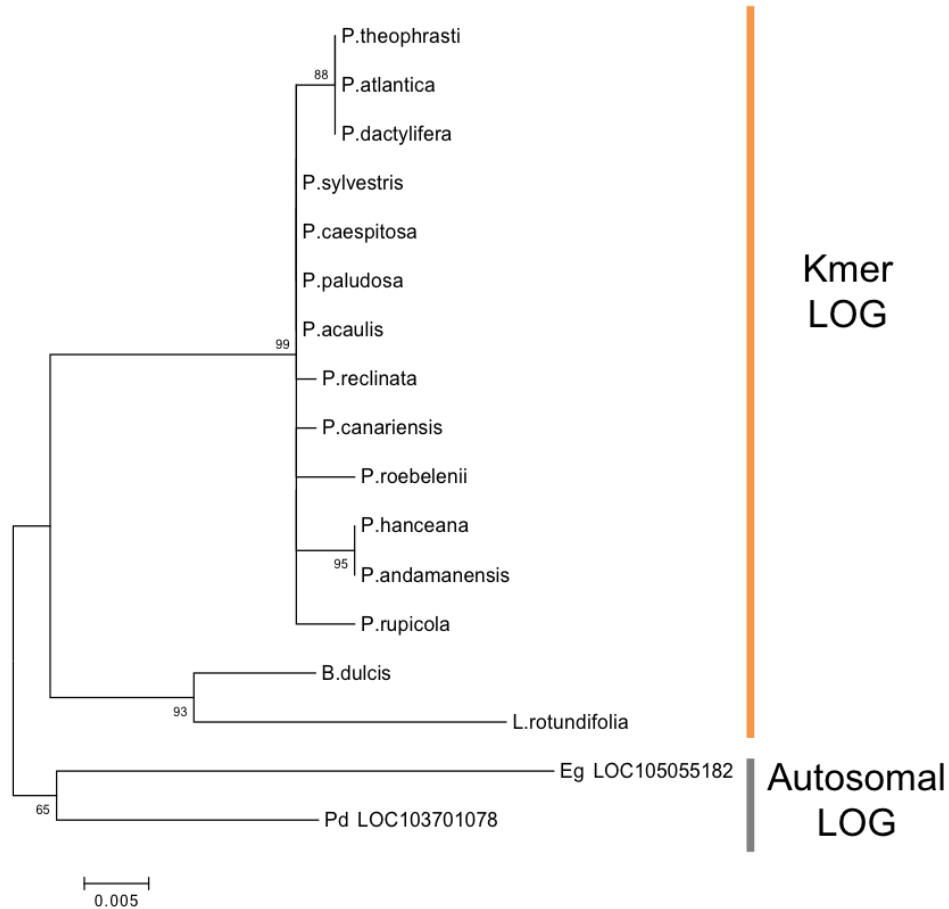

**Supplementary Figure 4. Autosomal and male-specific LOG phylogeny.**

Maximum likelihood phylogenetic tree based on alignment of k-mer derived LOG sequences from *Phoenix* and the hermaphrodites *Brahea* and *Livistona*. Branch support values indicated at the nodes were obtained by 1000 bootstrap replications. Branch lengths represent number of substitutions per site. The Oil Palm LOG sequence (Eg\_LOC105055182) was utilized to infer *de novo* sequences from other palm species. The *P. dactylifera* autosomal LOG (Pd\_LOC103701078) was included for reference. Eg= *Elaeis guineensis*. *B. dulcis*= *Brahea dulcis*. *L. rotundifolia* = *Livistona rotundifolia*

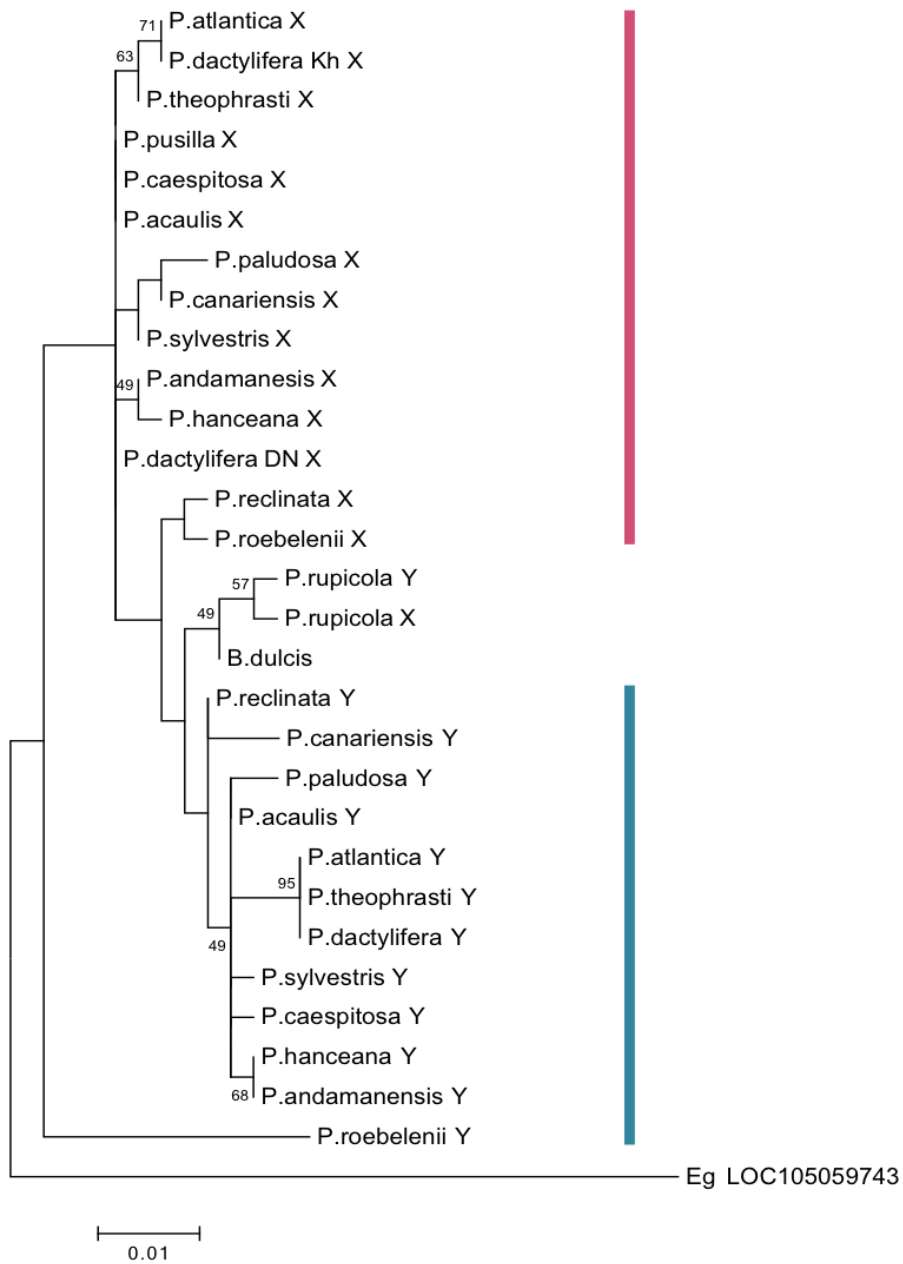

**Supplementary Figure 5. Cytidine deaminase phylogeny.** Maximum likelihood phylogenetic tree based on alignment of kmer derived cytidine deaminase cDNA sequences from *Phoenix* and *Brahea*. Branch support values at the nodes (if >40%) were obtained by 1000 bootstrap replications.

Branch lengths represent number of substitutions per site. Cytidine deaminase sequences were inferred *de novo* from sequenced male and female BACs. The oil palm cytidine deaminase gene (*Eg*\_LOC105059743) was included as an outgroup. *Eg*= *Elaeis guineensis*. *B. dulcis*= *Brahea dulcis*. *P. dactylifera* DN= *P. dactylifera Deglet Noor*. *P. dactylifera* Kh= *P. dactylifera Khalas*. Male alleles for the genus clustered together in general (blue line – Y alleles, red line – X alleles)

**Supplementary Table 1. A table with all samples used for kmer analysis and validation test in this study**

| Species                              | Sex  | ID          | Collection            | Short name   | Sequence coverage |
|--------------------------------------|------|-------------|-----------------------|--------------|-------------------|
| <b>Used in kmer analysis</b>         |      |             |                       |              |                   |
| <i>P. dactylifera (Deglet Noor)*</i> | F    | RIV 2154    | USDA, CA              | dnPdF        | 71.3517           |
| <i>P. dactylifera (Deglet Noor)</i>  | M    | RIV 2165 PL | USDA, CA              | dnPdM        | 67.531            |
| <i>P. dactylifera (Khalas)</i>       | F    | khlsF       | Qatar                 | khlsF2016    | 69.4486           |
| <i>P. roebilinii</i>                 | F    | RIV 2922 PL | USDA, CA              | P03roeF      | 23.3215           |
| <i>P. roebilinii</i>                 | M    | RIV 2963 PL | USDA, CA              | P5roeM       | 37.2331           |
| <i>P. canariensis</i>                | F    | RIV 6839 PL | USDA, CA              | P08canF      | 34.7572           |
| <i>P. canariensis</i>                | M    | RIV 6840 PL | USDA, CA              | P09canM      | 67.0642           |
| <i>P. hanceana (loureiroi?)</i>      | M    | RIV 6823 PL | USDA, CA              | P13hanM      | 28.1128           |
| <i>P. hanceana (loureiroi?)</i>      | F    | RIV 6791 PL | USDA, CA              | P14hanF      | 27.5131           |
| <i>P. paludosa</i>                   | F    | RIV 6817 PL | USDA, CA              | P17palF      | 38.5184           |
| <i>P. paludosa</i>                   | M    | RIV 6819 PL | USDA, CA              | P19palM      | 45.7222           |
| <i>P. reclinata</i>                  | M    | RIV 6807 PL | USDA, CA              | P20recM      | 58.0921           |
| <i>P. reclinata</i>                  | F    | RIV 6811 PL | USDA, CA              | P21recF      | 41.3914           |
| <i>P. sylvestris</i>                 | F    | RIV 2248 PL | USDA, CA              | P23sylF      | 32.3765           |
| <i>P. sylvestris</i>                 | M    | RIV 7395 PL | USDA, CA              | P25sylM      | 27.5639           |
| <i>P. andamanensis</i>               | F    | N/A         | UMH, Spain            | Q01andF      | 36.6741           |
| <i>P. andamanensis</i>               | M    | N/A         | UMH, Spain            | Q03andM      | 41.7865           |
| <i>P. caespitosa</i>                 | F    | N/A         | UMH, Spain            | Q07caeF      | 55.0238           |
| <i>P. caespitosa</i>                 | M    | N/A         | UMH, Spain            | Q09caeM      | 45.7855           |
| <i>P. acaulis</i>                    | F    | N/A         | UMH, Spain            | P02acaF      | 31.0049           |
| <i>P. acaulis</i>                    | M    | N/A         | UMH, Spain            | Q10acaM      | 29.0575           |
| <i>P. theophrastii</i>               | F    | N/A         | UMH, Spain            | Q17theF      | 33.7925           |
| <i>P. theophrastii</i>               | M    | N/A         | UMH, Spain            | Q19theM      | 93.2802           |
| <i>P. atlantica</i>                  | F    | N/A         | UMH, Spain            | Q22atlF      | 48.0664           |
| <i>P. atlantica</i>                  | M    | N/A         | UMH, Spain            | Q23atlM      | 48.9665           |
| <i>P. rupicola</i>                   | F    | N/A         | UMH, Spain            | P0XrupF      | 22.906            |
| <i>P. rupicola</i>                   | M    | N/A         | UMH, Spain            | Q15rupM      | 36.4488           |
| <i>P. pusilla</i>                    | F    | N/A         | UMH, Spain            | Q14pusF      | 30.7199           |
| <i>Brahea dulcis</i>                 | Herm | N/A         | Hunington Gardens, CA | braheaSpp    | 44.8707           |
| <i>Livistona rotundifolia</i>        | Herm | N/A         | Hunington Gardens, CA | livistonaSpp | 32.4906           |
| <b>Used in validation test</b>       |      |             |                       |              |                   |
| <i>P. acaulis</i>                    | F    | RIV 3363 PL | USDA, CA              | P01acaF      | 38.33             |
| <i>P. roebilinii</i>                 | F    | RIV 2939 PL | USDA, CA              | P04roeF      | 20.74             |
| <i>P. canariensis</i>                | F    | RIV 6836 PL | USDA, CA              | P06canF      | 31.86             |
| <i>P. canariensis</i>                | M    | RIV 6837 PL | USDA, CA              | P07canM      | 26.79             |
| <i>P. reclinata</i>                  | F    | RIV 2975 PL | USDA, CA              | P10senF      | 34.4              |
| <i>P. hanceana (loureiroi)</i>       | F    | RIV 6822 PL | USDA, CA              | N/A          | 40.88             |
| <i>P. hanceana (loureiroi)</i>       | M    | RIV 6789 PL | USDA, CA              | N/A          | 33.8              |
| <i>P. hanceana (loureiroi)</i>       | F    | RIV 6790 PL | USDA, CA              | N/A          | 32.77             |
| <i>P. hanceana (loureiroi)</i>       | M    | RIV 6793 PL | USDA, CA              | N/A          | 30.81             |

|                      |   |             |          |     |       |
|----------------------|---|-------------|----------|-----|-------|
| <i>P. paludosa</i>   | M | RIV 6818 PL | USDA, CA | N/A | 31.35 |
| <i>P. reclinata</i>  | F | RIV 6812 PL | USDA, CA | N/A | 30.73 |
| <i>P. sylvestris</i> | F | RIV 2256 PL | USDA, CA | N/A | 43.32 |
| <i>P. sylvestris</i> | M | RIV 2249 PL | USDA, CA | N/A | 43.09 |

\* *P.* denotes *Phoenix*



**Supplementary Table 2. A table of contigs/scaffolds used in this study**

| Name             | X, Y, or Autosomal | Length (bp) | NCBI Accession |
|------------------|--------------------|-------------|----------------|
| dpS5Y            | Y                  | 567483      | MH680965       |
| dpS5X            | X                  | 566497      | MH680976       |
| dpS5560CH1       | Autosomal          | 1371428     | MH680988       |
| dpS5560CH2       | Autosomal          | 1366600     | MH680991       |
| dpS5784H1        | X                  | 706543      | MH680973       |
| dpS5784H2        | Y                  | 705158      | MH680984       |
| dpS12Y           | Y                  | 89036       | MH680966       |
| dpS12X           | X                  | 89768       | MH680977       |
| dpS5828CH1       | Autosomal          | 225201      | MH680987       |
| dpS5828CH2       | Autosomal          | 225793      | MH680990       |
| dpS5887CH1       | Autosomal          | 30183       | MH680989       |
| dpS5887CH2       | Autosomal          | 30198       | MH680992       |
| dpS10Y           | Y                  | 34743       | MH680969       |
| dpS10X           | X                  | 34736       | MH680980       |
| dpS9X            | X                  | 43944       | MH680975       |
| dpS9Y            | Y                  | 41807       | MH680986       |
| dpS6X            | X                  | 89164       | MH680970       |
| dpS6Y            | Y                  | 91697       | MH680981       |
| dpS8Y            | Y                  | 105672      | MH680967       |
| dpS8X            | X                  | 104842      | MH680978       |
| dpS6284H1        | Y                  | 144017      | MH680968       |
| dpS6284H2        | X                  | 143984      | MH680979       |
| dpS11X           | X                  | 27585       | MH680974       |
| dpS11Y           | Y                  | 27658       | MH680985       |
| dpS6694H1        | Y                  | 147216      | MH680971       |
| dpS6694H2        | X                  | 147682      | MH680982       |
| dpS4X            | X                  | 201024      | MH680972       |
| dpS4Y            | Y                  | 201034      | MH680983       |
| dpB13X           | X                  | 198875      | MH680995       |
| dpB3X            | X                  | 282833      | MH680993       |
| dpB1X            | X                  | 137710      | MH680996       |
| dpBLOGautosomal1 | Autosomal          | 101049      | MH680997       |
| dpBLOGautosomal2 | Autosomal          | 135777      | MH680964       |
| dpB7X            | X                  | 349331      | MH680994       |
| dpB3Y            | Y                  | 289622      | MH681003       |
| dpBCYPlike       | Y                  | 274394      | MH680999       |
| dpB1Y            | Y                  | 130775      | MH681004       |
| dpBGPATlike      | Y                  | 238144      | MH681000       |
| dpBLOGlike       | Y                  | 111099      | MH681001       |
| dpB2Y            | Y                  | 781564      | MH681002       |
| dpS2X            | X                  | 303122      | MH680998       |

**Supplementary Table 3. PCR primers used for identifying male specific regions**

| Primer name    | Primer sequence                 | Gene/Contig amplified | Amplicon size(bp) | Genic amplicon |
|----------------|---------------------------------|-----------------------|-------------------|----------------|
| dpBCYP1F       | 5'- AGTGAGTTTCAACTACTACGAT -3'  | CYP contig            | 372               | No             |
| dpBCYP1R       | 5'- GTCATAAACTTGACTAAAGACC -3'  | Cyp contig            |                   |                |
| dpBCYP2F       | 5'- CTTCGATTTTCTCTTTGATCTC -3'  | CYP contig            | 418               | No             |
| dpBCYP2R       | 5'- TCAATCCCTTAAACCACTAAAC -3'  | Cyp contig            |                   |                |
| dpBGPAT1F      | 5'- AGAAAACCTGATATGCTCTCTG -3'  | GPAT contig           | 450               | Yes            |
| dBpGPAT1R      | 5'- TGTGATGCACTTGGAATACTACT -3' | GPAT contig           |                   |                |
| dpBGPAT2F      | 5'- GGGTCCATTATAAAGTCTTGAA -3'  | GPAT contig           | 550               | No             |
| dBpGPAT2R      | 5'- GCGTGTGATATACATTGTCCTA -3'  | GPAT contig           |                   |                |
| dpBLOG1F       | 5'- ATGTAGCTAGACAACCACAACA -3'  | LOG contig            | 350               | No             |
| dpBLOG1R       | 5'- CAGCTTATCAGATGACACAATC -3'  | LOG contig            |                   |                |
| dpBCLOGauto_1F | 5'- TGCTTATGTTCTCTTGTCTACG -3'  | Autosomal log         | 440               | No             |
| dpBCLOGauto_1R | 5'- ATCATGGGTGAGAGAGAGTTAC -3'  | Autosomal log         |                   |                |
| dpBCLOGauto_2F | 5'- ATGATGAGAGAGCTATTGTTCA -3'  | Autosomal log         | 365               | Yes            |
| dpBCLOGauto21R | 5'- AATCATCTGATCAAAATGAGAG -3'  | Autosomal log         |                   |                |
| CYP703_ORF_1F  | 5'- GAATGGTAAGATCTTGAAGTCC -3'  | Cyp Gene              | 1500              | Yes            |
| CYP703_ORF_1R  | 5'- TAGATGTGGTTCTTGTGTCTGT -3'  | Cyp Gene              |                   |                |

### Supplementary References

1. Beisson, F., Li, Y., Bonaventure, G., Pollard, M. & Ohlrogge, J. B. The Acyltransferase GPAT5 Is Required for the Synthesis of Suberin in Seed Coat and Root of Arabidopsis. *PLANT CELL ONLINE* **19**, 351–368 (2007).
2. Men, X. *et al.* Glycerol-3-Phosphate Acyltransferase 3 (OsGPAT3) is required for anther development and male fertility in rice. *J. Exp. Bot.* **68**, 513–526 (2017).
