# Supplementary material for: Genus-wide sequencing supports a two-locus model for sex-determination in Phoenix
Source: PubMed Central journal article supplement (PMC6162277; doi:10.1038/s41467-018-06375-y), 2018-09-28
Supplement: 41467_2018_6375_MOESM3_ESM.pdf [file 41467_2018_6375_MOESM3_ESM.pdf]

## **Descriptions of Additional Supplementary Files**

File Name: Supplementary Dataset 1

Description: A text file containing 16bp kmers identified in all 13 species male but absent in 14 Phoenix females.
